# Supplementary material for: The controllable synthesis of NiO/Ni/C nanosheets via pulsed plasma in ethylene glycol solution for oxygen evolution electrocatalysis
Source: Royal Society of Chemistry journal article supplement (doi:10.1039/d3ra02544f), 2023-01-01
Supplement: d3ra02544f1.pdf [file d3ra02544f1.pdf]

# The controllable synthesis of NiO/Ni/C nanosheets via pulsed plasma in ethylene glycol solution for oxygen evolution electrocatalysis

Rong TU <sup>a, b, c</sup>, Kunqiu Leng <sup>a, b</sup>, Chao SONG <sup>d</sup>, Chitengfei Zhang <sup>e, a, b, \*</sup>, Yingqiu ZHENG <sup>a, b</sup>, Yuzhe HAN <sup>a</sup>, Guoqiang LUO <sup>a, b</sup>, Song ZHANG <sup>a, b, e</sup>, Takashi Goto <sup>a</sup>

<sup>a</sup> Chaozhou Branch of Chemistry and Chemical Engineering Guangdong Laboratory, Chaozhou 521000, China

<sup>b</sup> State Key Laboratory of Advanced Technology for Materials Synthesis and Processing, Wuhan University of Technology, Wuhan 430070, China

<sup>c</sup> Wuhan University of Technology Advanced Engineering Technology Research Institute of Zhongshan City, Zhongshan 528400, China

<sup>d</sup> School of Materials Science and Engineering, Hanshan Normal University, Chaozhou 521041, China

<sup>e</sup> Hubei Longzhong laboratory, Xiangyang 441000, China

\*Corresponding author: Chitengfei ZHANG

E-mail: [zctf@foxmail.com](mailto:zctf@foxmail.com)

Table S1 Parameters of the pore structure characteristics.

| Sample | S <sub>BET</sub> (m <sup>2</sup> g <sup>-1</sup> ) |
|--------|----------------------------------------------------|
| EG0    | 153                                                |
| EG10   | 211                                                |
| EG30   | 149                                                |
| EG50   | 147                                                |
| EG70   | 148                                                |
| EG90   | 116                                                |

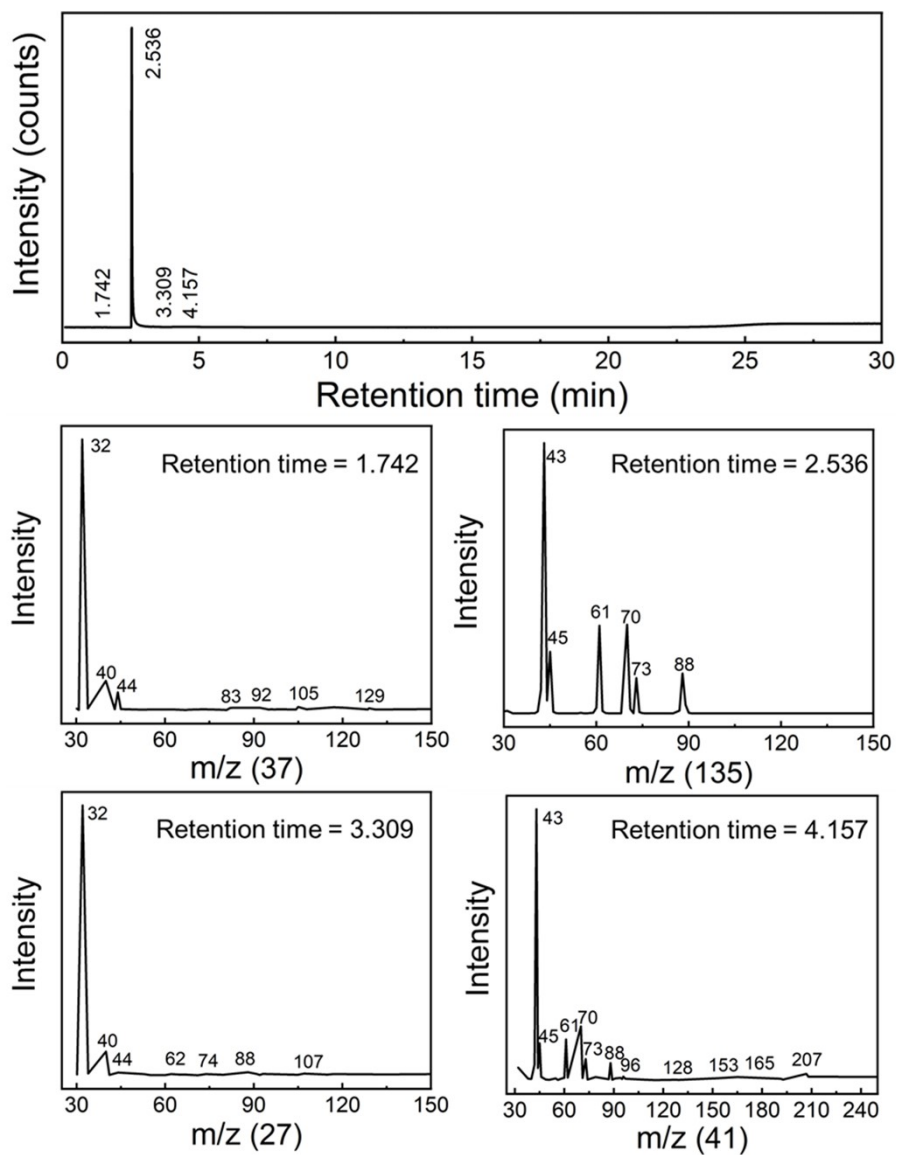

Fig. S1 GC-MS spectrometry of EG solution after reaction.

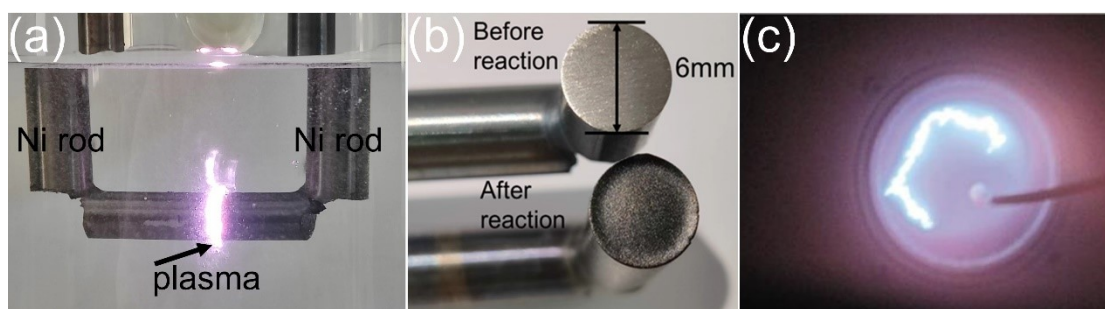

Fig. S2 (a) discharge process of pulsed plasma, (b) appearance of nickel rods before and after plasma action, (c) the process of multi-arc ion plating.

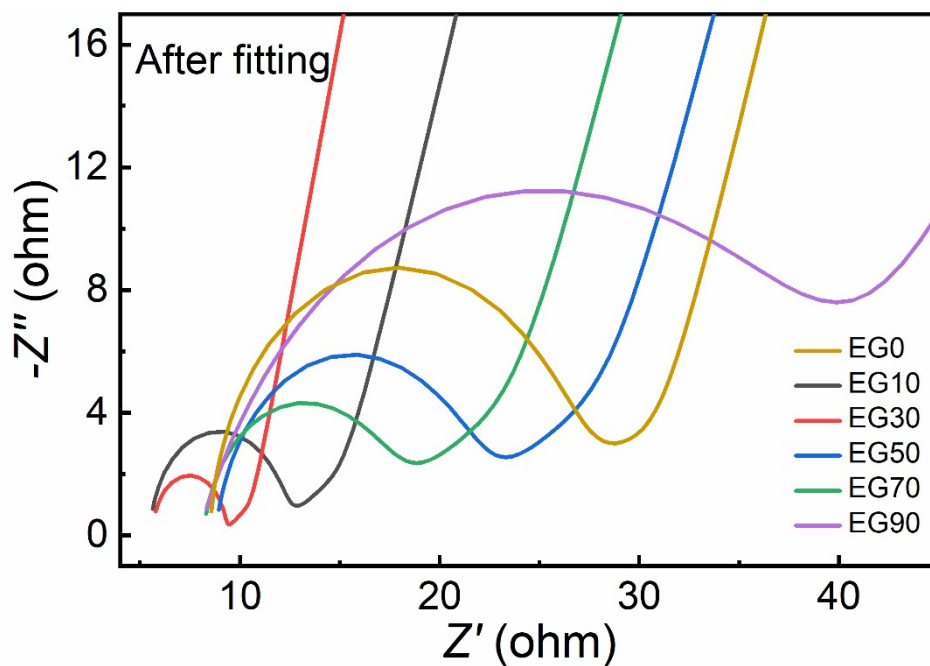

Fig. S3 Fitted EIS Nyquist plots.

Table S2 Organic components that may be present after reaction.

| Retention time (min) | Components                                                                              |
|----------------------|-----------------------------------------------------------------------------------------|
| 1.742                | Hydrazinecarboxamide, Carbonic dihydrazide, Hydrazine,<br>Acetic acid                   |
| 2.536                | Ethyl Acetate, Ethyl acetate, Methylolacetone, Pentanoic<br>acid, Methanol, Acetic acid |
| 3.309                | Carbonic dihydrazide, Hydrazinecarboxamide, Hydrazine,<br>Propanoic acid                |
| 4.157                | Ethyl Acetate, Methylolacetone, Methanol, 2-Butanone,<br>Propanoic acid                 |

Table S3 OER performance parameters of different samples.

| Sample | Overpotential<br>(mV) | Tafel slope<br>(mV dec <sup>-1</sup> ) | C <sub>dl</sub><br>( $\mu\text{F cm}^{-2}$ ) | R <sub>ct</sub><br>( $\Omega$ ) |
|--------|-----------------------|----------------------------------------|----------------------------------------------|---------------------------------|
| EG0    | 364.4                 | 93.71                                  | 118.35                                       | 17.52                           |
| EG10   | 304.4                 | 101.52                                 | 218.99                                       | 6.428                           |
| EG30   | 289.2                 | 88.29                                  | 357.32                                       | 3.437                           |
| EG50   | 331.78                | 99.3                                   | 118.21                                       | 12.4                            |
| EG70   | 344.6                 | 100.34                                 | 129.01                                       | 8.819                           |
| EG90   | 360.8                 | 132.67                                 | 86.37                                        | 32.81                           |

Table S4 EIS fitted data table of different samples.

| Sample | EG0          | EG10      | EG30      | EG50      | EG70      | EG90      |
|--------|--------------|-----------|-----------|-----------|-----------|-----------|
| R1     | 8.49         | 5.531     | 5.689     | 8.786     | 8.168     | 7.929     |
| R2     | 17.52        | 6.428     | 3.437     | 12.4      | 8.819     | 32.81     |
| W1-R   | 13.48        | 8.543     | 3.854     | 19.51     | 18.05     | 1149      |
| W1-T   | 0.02921<br>1 | 0.050417  | 0.039699  | 0.086622  | 0.057272  | 16.11     |
| W1-P   | 0.3912       | 0.39045   | 0.41274   | 0.38459   | 0.38468   | 0.62236   |
| CPE1-T | 2.982E-6     | 1.5641E-6 | 7.6703E-7 | 4.7506E-6 | 5.5445E-6 | 4.5392E-5 |
| CPE1-P | 0.96578      | 1.007     | 1.068     | 0.92575   | 0.92679   | 0.74904   |
